# Supplementary material for: Convenient hyaluronidase biosensors based on the target-trigger enhancing of the permeability of a membrane using an electronic balance as a readout
Source: Royal Society of Chemistry journal article supplement (doi:10.1039/d1an00257k), 2021-01-01
Supplement: d1an00257k1.pdf [file d1an00257k1.pdf]

## Supplementary Information

### Convenient Hyaluronidase Biosensor Based on the Target-Trigger Enhancing of Permeability of a Membrane Using Electronic Balance as a Readout

Nuo Dong,<sup>†a,b,c\*</sup> Qing Cai,<sup>†a</sup> Zhixin Li,<sup>d</sup> Liangzhen Xu,<sup>a</sup> Huping Wu,<sup>a,c</sup> Zhirong Lin,<sup>a,c</sup>  
Bin Qiu,<sup>d</sup> Cheng Li,<sup>a\*</sup> and Zhenyu Lin<sup>d\*</sup>

<sup>a</sup>Eye Institute & Affiliated Xiamen Eye Center, School of Medicine, Xiamen University, Xiamen, Fujian, China.

<sup>b</sup>Department of Ophthalmology, Affiliated people's hospital & Zhenjiang kangfu eye hospital, Jiangsu university, Zhenjiang, Jiangsu, China.

<sup>c</sup>Fujian Provincial Key Laboratory of Ocular Surface and Corneal Disease, Xiamen, Fujian, China.

<sup>d</sup>Ministry of Education Key Laboratory for Analytical Science of Food Safety and Biology, Fujian Provincial Key Laboratory of Analysis and Detection for Food Safety, College of Chemistry, Fuzhou University, Fuzhou, Fujian, China.

<sup>†</sup>These authors contributed equally to this work.

Corresponding author: Nuo Dong, Cheng Li, Zhenyu Lin;

E-mail: profeye@163.com (N Dong)

E-mail: cheng-li@xmu.edu.cn (C Li)

E-mail: zylin@fzu.edu.cn (ZY Lin)

Table S1 The comparison of different measurement methods for HAase.

| Method                      | Detection time (min) | Linear Range (U/mL) | LOD (U/mL) | References |
|-----------------------------|----------------------|---------------------|------------|------------|
| colorimetric                | 65                   | -                   | 2.4        | 1          |
| Fluorescence                | 180                  | 1.25 - 50           | 0.625      | 2          |
| Fluorescence & colorimetric | 120                  | 0.1 - 80            | 0.06       | 3          |
| Fluorescence                | 45                   | 1 - 50              | 0.7        | 4          |
| Fluorescence                | 65                   | 0.5 - 37.5          | 0.30       | 5          |
| Weighting                   | 5                    | 1.0 - 36            | 0.35       | This Work  |

### Notes and references

1. A. I. Nossier, S. Eissa, M. F. Ismail, M. A. Hamdy and H. M. E.-S. Azzazy, *Biosens. Bioelectron.*, 2014, **54**, 7-14.
2. D. Cheng, W. Han, K. Yang, Y. Song, M. Jiang and E. Song, *Talanta*, 2014, **130**, 408-414.
3. S. Liu, N. Zhao, Z. Cheng and H. Liu, *Nanoscale*, 2015, **7**, 6836-6842.
4. W. Gu, Y. Yan, C. Zhang, C. Ding and Y. Xian, *Acs Appl. Mater. Interfaces*, 2016, **8**, 11272-11279.
5. Q. Liu, X. Yan, Q. Lai and X. Su, *Sens. Actuators, B*, 2019, **282**, 45-51.
